# Supplementary material for: One-stop radiotherapeutic targeting of primary and distant osteosarcoma to inhibit cancer progression and metastasis using 2DG-grafted graphene quantum dots
Source: Royal Society of Chemistry journal article supplement (doi:10.1039/c9nr10823h), 2020-01-01
Supplement: c9nr10823h1.pdf [file c9nr10823h1.pdf]

One stop radiotherapeutic targeting of primary and distant osteosarcoma to inhibit  
cancer progression and metastasis using 2DG-grafted graphene quantum dots

Fu-I Tung<sup>1,2</sup>, Lu-Jun Zheng<sup>3,+</sup>, Kai-Ting Hou<sup>4,+</sup>, Chih-Sheng Chiang<sup>4</sup>, Ming-Hong  
Chen<sup>5,6,7,\*</sup>, Tse-Ying Liu<sup>4,\*</sup>

1. Dr. Fu-I Tung

Department of Orthopaedic Surgery, Taipei City Hospital, Yangming branch  
Taipei City 112, Taiwan  
E-mail: fui.tung@gmail.com

2. Dr. Fu-I Tung

Department of Health and Welfare, College of City Management, University of Taipei,  
  
Taipei City 112, Taiwan  
E-mail: fui.tung@gmail.com

3. MS Lu-Jun Zheng

Department of Medical Imaging, National Taiwan University Hospital,  
Taipei, Taipei City 112, Taiwan  
E-mail: k12388877@gmail.com

4. Prof. Tse-Ying Liu

Department of Biomedical Engineering, National Yang Ming University,  
Taipei City 112, Taiwan  
E-mail: tyliu5@ym.edu.tw

5. Ming-Hong Chen

Department of Neurosurgery, Taipei Municipal Wanfang Hospital,  
Taipei, Taiwan, ROC.  
Email: chen.minghong@gmail.com

6. Ming-Hong Chen

School of Medicine, College of Medicine,  
Taipei Medical University, Taipei, Taiwan, ROC.  
Email: chen.minghong@gmail.com

7. Ming-Hong Chen

Graduate Institute of Nanomedicine and Medical Engineering,  
Taipei Medical University, Taipei, Taiwan, ROC  
Email: chen.minghong@gmail.com

<sup>†</sup> the authors contributed equally to this work.

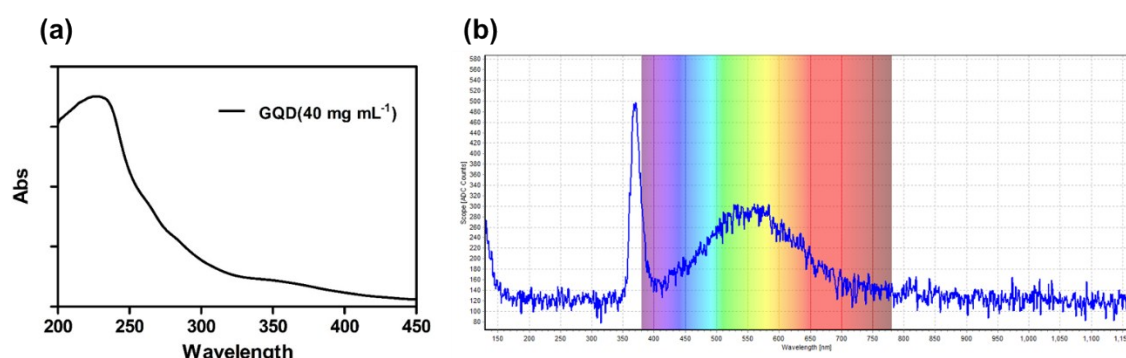

**Fig. S1** The optical properties of the GQDs in aqueous solution. (A) UV-vis absorption spectra. (B) Fluorescent spectra under 360 nm laser excitation.

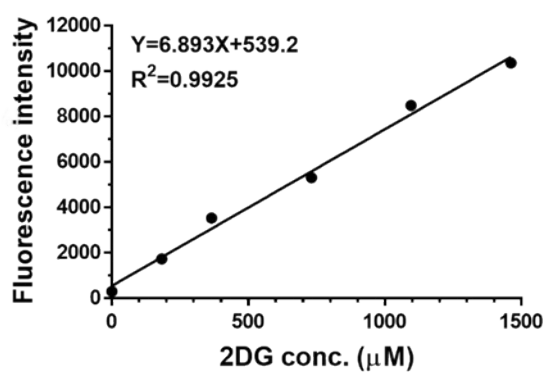

**Fig S2.** Quantitative analysis of 2DG on the GQD by fluorescamine assay. The calibration curve of 2DG using fluorescamine assay at an emission of 460 nm shows a linear relationship between the fluorescence intensity and the concentration of 2DG.

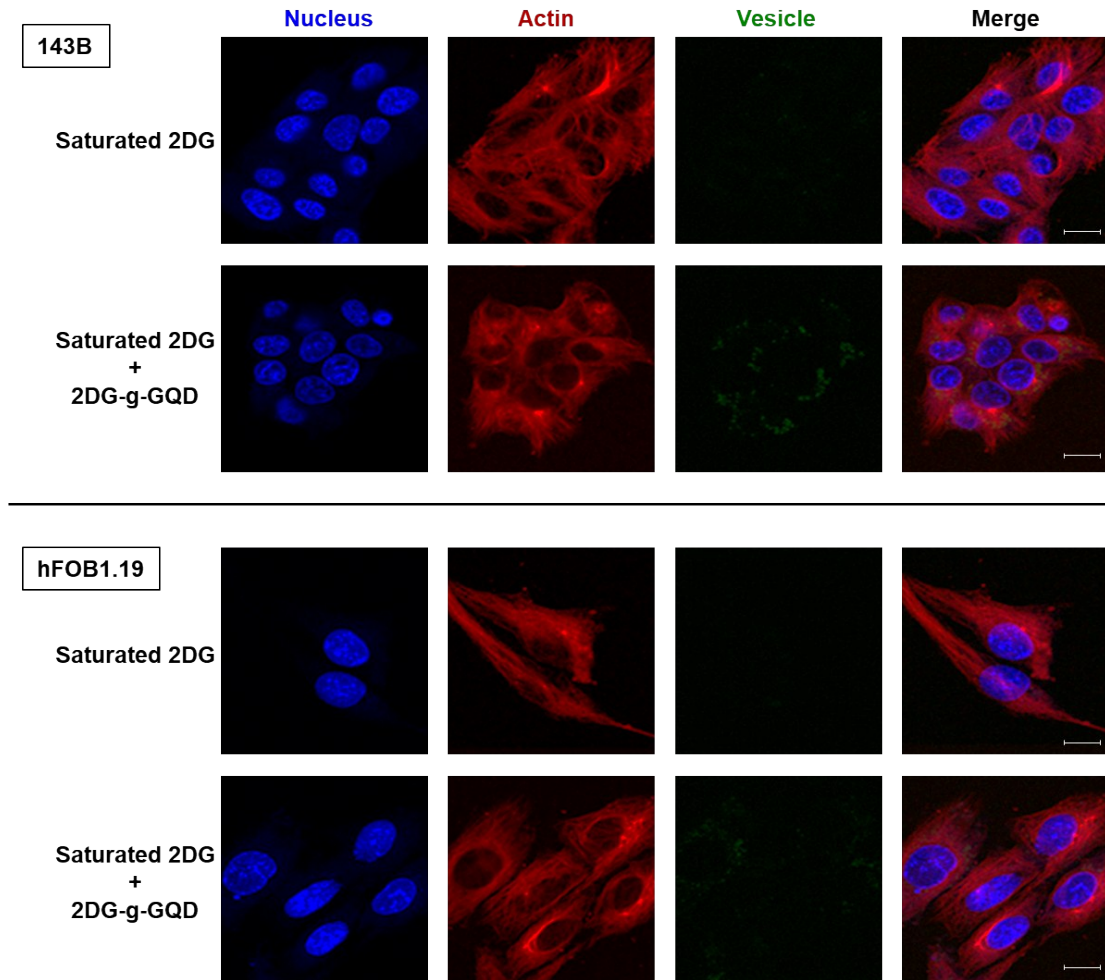

**Fig. S3** The specific targeting ability of 2DG-g-GQDs was examined by glucose uptake assay. 143B and hFOB 1.19 cells were incubated with 2DG for 24 h before incubation with 2DG-g-GQDs. The slight uptake of 2DG-g-GQDs (green) indicated that introduced of 2DG prior to 2DG-g-GQDs inhibited the cell association. Hoechst (blue), actin (red), 2DG-g-GQD (green). The scale bar is 20  $\mu$ m.

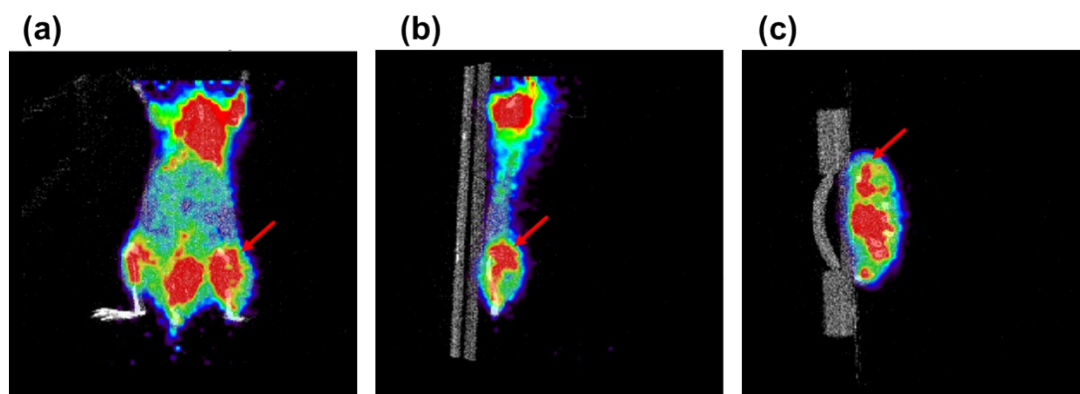

**Fig. S4** Micro PET images of (A) sagittal, (B) coronal, (C) transverse. As shown, in situ osteosarcoma was successfully implanted in (nu/nu) mice.

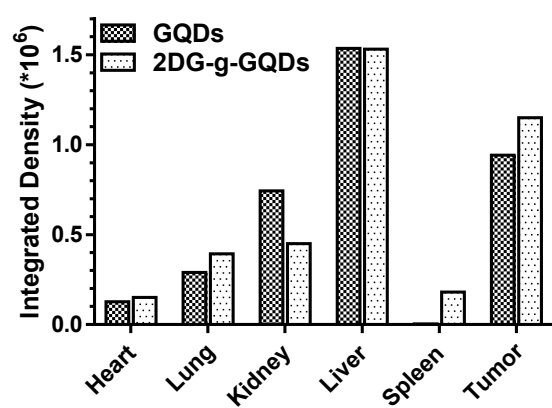

**Fig. S5** In vivo biodistribution of GQDs and 2DG-g-GQDs was semi-quantified in various organs of tumour-bearing nude mice.

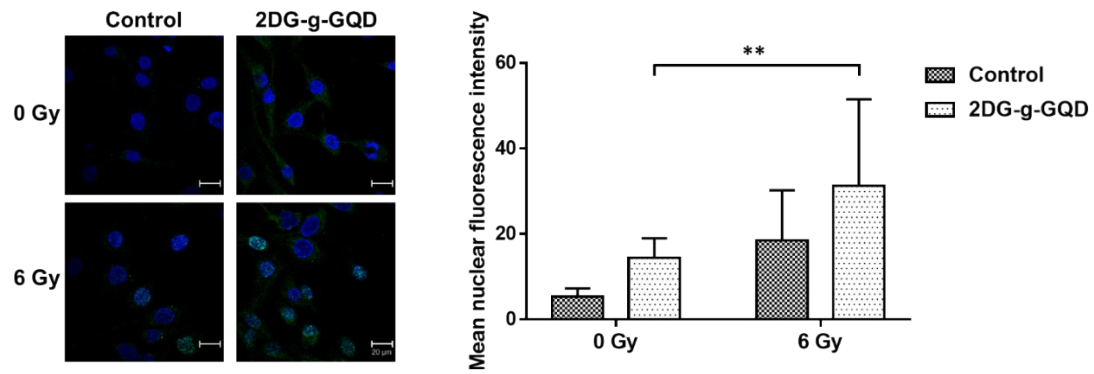

**Fig. S6** (a) Immunofluorescence staining of  $\gamma$ -H2AX for monitoring DNA double strand break (DSB) in 143B cells. Cells were treated with-without X-ray radiation (6 Gy) in the presence or absence of 2DG-g-GQDs ( $1 \text{ mg mL}^{-1}$ ). DAPI (blue),  $\gamma$ -H2AX and 2DG-g-GQDs (green). Scale bar =  $20 \text{ }\mu\text{m}$ . (b) The fluorescence intensity in each nucleus was measured by ImageJ and further analyzed by two-way ANOVA multiple comparison test. In short, the area of nuclei was selected through the color threshold (color space: RGB). The intensity of green channel in the selected area were measured after splitting channels.
